# Supplementary material for: Brazilian Dialysis Survey 2020
Source: PubMed Central journal article supplement (PMC9518621; doi:10.1590/2175-8239-jbn-2021-0198), 2022-02-23
Supplement: 2175-8239-jbn-2021-0198-suppl1.pdf [file 2175-8239-jbn-2021-0198-suppl1.pdf]

## Supplementary Material to the “Brazilian Dialysis Survey 2020”

**ATTENTION:** You must fill out the form on the website, forms sent by e-mail or fax will not be considered.

### INFORMATION NEEDED TO COMPLETE THE ONLINE

#### CENSUS 2020

#### 2020 Census - Registration

##### STEP 01 - Registration

##### Registration information

Company Name:

CNPJ#:

Hospital:

Address:

City:

STATE:

ZIP:

Telephone:

Extension:

Fax:

E-mail:

Physician in Charge - Dr.:

Person responsible for filling this form up:

Capacity: ( ) Manager ( ) Social worker ( ) Nurse ( ) Physician ( ) Secretary

Number of Nephrologists working in the Dialysis Center:

Unit Profile Type: ( ) Non-profitable ( ) Private\* ( ) Public

University? ( ) Yes ( ) No

If private:

Clinic owners:

( ) Group made up of nephrologists

( ) Group made up of nephrologists and non-nephrologist physicians

( ) Group made up of non-nephrologist physicians

( ) Group made up of physicians and non-medical personnel

( ) Hospital where the clinic is located

( ) International corporation

Localization: ( ) in-hospital ( ) remote

Partnerships

( ) Public Healthcare System (SUS) ( ) Other Healthcare Insurances ( ) Both

**Dialysis**

**Is there a chronic dialysis program (HD or PD)?**

yes  no

**If yes:**

**Working?**

yes  no

**IF YOUR PROGRAM IS WORKING, PLEASE ANSWER THE FOLLOWING QUESTIONS; IF NOT, YOU HAVE FINISHED YOUR FORM.**

**STEP 02 – Demographic data**

**Registration information**

**Total number of patients under regular dialysis on July 01, 2020:**

**Number of patients under the chronic dialysis program on July 01, 2020:**

|                                                                   | <b>SUS</b> | <b>Non-SUS</b> | <b>Total</b> |
|-------------------------------------------------------------------|------------|----------------|--------------|
| <b>Conventional HD at the dialysis center</b>                     |            |                |              |
| <b>Daily HD (more than 4 times a week) in the dialysis center</b> |            |                |              |
| <b>Home HD, any regimen</b>                                       |            |                |              |
| <b>CAPD</b>                                                       |            |                |              |
| <b>APD</b>                                                        |            |                |              |
| <b>IPD</b>                                                        |            |                |              |
| <b>Total</b>                                                      |            |                |              |

**\*SUS: Public Healthcare System**

**The following questions have to do with patients in the chronic dialysis program on July 01, 2020**

**Patient profiles:**

**Age range**

**0 to 12 years:**

**13 to 19 years:**

**20 to 44 years:**

**45 to 64 years:**

**65 to 74 years:**

**75 years or older:**

**Sex**

**Male:**

**Female:**

**Chronic kidney disease etiology: (Fill out Only 1 diagnostic per patient)**

**Diabetes:**

**Hypertension:**

**Glomerulonephritis:**

**Polycystic kidneys:**

**Others:**

**Undetermined:**

**Number of patients currently under dialysis who have received a kidney transplant and lost it:  
Number of patients on HD using short-term central venous catheter as a hemodialysis access  
on Jul/01/2020.**

**Number of patients on HD using long central venous catheter as hemodialysis access on  
Jul/01/2020**

**Number of patients on HD using arteriovenous graft (prosthesis) as hemodialysis access on  
Jul/01/2020:**

**Comorbidities:**

**Number of patients with:**

**B hepatitis:**

**C hepatitis:**

**HIV:**

### **KIDNEY TRANSPLANT**

**Number of patients enrolled for transplant on Ju/01/2020:**

### **STEP 03**

**New patients:**

**(Who started dialysis on July 2020 – DOES NOT INCLUDE patients who came from another  
regular dialysis program; Only those who truly started a chronic dialysis program and were  
not on dialysis before).**

**Total:**

**Number of new patients diagnosed with diabetes:**

**Deaths:**

**Deaths in July 2020: (If none, enter 0)**

---

### **STEP 04: Census about COVID-19 on dialysis**

On this step we ask you to fill out information about the COVID-19 pandemic impacts on patients and employees of dialysis clinics. The questions below pertain to the period of 02/26/2020 to 07/31/2020.

#### **As for the patients with Covid-19**

Number of patients with diagnosis confirmed by exam: \_\_\_\_\_;

Of the confirmed cases, how many were on hemodialysis? \_\_\_\_\_; How about on peritoneal dialysis?

\_\_\_\_\_

Number of patients admitted to a hospital:

Among the in-patients, how many required intensive care?

Strategy used in the clinic concerning those patients with suspicion/diagnosis of COVID:

( ) Dialysis under isolation: separated room/box

( ) Dialysis on a specific shift

Confirmed number of deaths by Covid-19:

#### **Concerning healthcare professionals with Covid-19**

Number in the clinic: Physicians: \_\_\_\_\_ Nurses: \_\_\_\_\_ Nurse assistants: \_\_\_\_\_

Number with confirmed diagnosis: Physicians: \_\_\_\_\_ Nurses: \_\_\_\_\_ Nurse assistants: \_\_\_\_\_

Number of deaths: Physicians: \_\_\_\_\_ Nurses: \_\_\_\_\_ Nurse technicians: \_\_\_\_\_
